# Supplementary material for: First Nanoparticles of a Conductor Based on the Organic Donor Molecule BETS: κ-(BETS)2FeCl4
Source: MDPI journal article supplement (doi:10.3390/ma14164444), 2021-08-08
Supplement: s1 [file s1]

## Supplementary Material

### First nanoparticles of a conductor based on the organic donor molecule BETS: $\kappa$ -(BETS)<sub>2</sub>FeCl<sub>4</sub>

Kane Jacob, Christophe Faulmann, Dominique de Caro and Lydie Valade (LCC-CNRS, Toulouse, France)

#### 1) Refined cell and indexed peaks for $\kappa$ -(BETS)<sub>2</sub>FeCl<sub>4</sub> nanoparticles grown in the presence of OATM (10 molar eq. vs. BETS)

##### Bibliographic data:

Audit creation date: 1996-08-14  
 Audit creation method: CSD-ConQuest-V1  
 Author name: H.Kobayashi, H.Tomita, T.Naito, A.Kobayashi, F.Sakai, T.Watanabe, P.Cassoux  
 Chemical name systematic: bis(bis(Ethylenedithio)tetraselenafulvalene) tetrachloro-iron  
 Formula sum: C<sub>20</sub>H<sub>16</sub>Cl<sub>4</sub>Fe<sub>1</sub>S<sub>8</sub>Se<sub>8</sub>  
 Journal name: J.Amer.Chem.Soc.  
 Journal volume: 118  
 Page first: 368

##### Structure and profile data:

Formula sum: Fe<sub>4</sub>Cl<sub>24</sub>Se<sub>32</sub>S<sub>32</sub>C<sub>80</sub>  
 Formula mass/ g/mol: 5587.7800  
 Density (calculated)/ g/cm<sup>3</sup>: 2.6044  
 F(000): 2592,0000  
 Mass Absorption Coefficient/ cm<sup>2</sup>/g: 82.6906  
 Space group (No.): P n m a (62)  
 Lattice parameters:  
   a/ Å: 11.680(4)  
   b/ Å: 35.92(2)  
   c/ Å: 8.491(3)  
   alpha/ °: 90  
   beta/ °: 90  
   gamma/ °: 90  
 V/ 10<sup>6</sup> pm<sup>3</sup>: 3562.2200

##### Non-indexed peaks

| No. | Th. (o) [°] | d-sp. (o) [Å] | Rel. Int. [%] | Height [cts] | Sin2 (o) |
|-----|-------------|---------------|---------------|--------------|----------|
| 1   | 4.6790      | 18.870510     | 3.32          | 9948.6450    | 167      |

##### Indexed peaks

| No. | h | k  | l | 2 $\Theta$ (c) [°] | 2 $\Theta$ (o) [°] | 2 $\Theta$ (d) [°] | d-sp. (c) [Å] | d-sp. (o) [Å] | d-sp. (d) [Å] |
|-----|---|----|---|--------------------|--------------------|--------------------|---------------|---------------|---------------|
| 1   | 0 | 2  | 0 | 4.9251             | 4.9249             | 0.0002             | 17.928120     | 17.928700     | -0.000582     |
| 2   | 0 | 4  | 0 | 9.8592             | 9.9326             | -0.0733            | 8.964062      | 8.898049      | 0.066012      |
| 3   | 0 | 3  | 1 | 12.7915            | 12.6421            | 0.1494             | 6.915005      | 6.996370      | -0.081365     |
| 4   | 1 | 0  | 1 | 12.8874            | 12.9014            | -0.0140            | 6.863772      | 6.856346      | 0.007426      |
| 5   | 0 | 6  | 0 | 14.8118            | 14.5743            | 0.2375             | 5.976040      | 6.072887      | -0.096846     |
| 6   | 1 | 3  | 1 | 14.8717            | 14.8794            | -0.0077            | 5.952113      | 5.949033      | 0.003080      |
| 7   | 0 | 5  | 1 | 16.1754            | 16.1322            | 0.0432             | 5.475216      | 5.489779      | -0.014563     |
| 8   | 2 | 2  | 1 | 19.0769            | 19.2390            | -0.1620            | 4.648482      | 4.609694      | 0.038787      |
| 9   | 1 | 1  | 2 | 22.4286            | 22.3939            | 0.0347             | 3.960833      | 3.966892      | -0.006059     |
| 10  | 1 | 4  | 2 | 24.4240            | 24.3144            | 0.1096             | 3.641562      | 3.657730      | -0.016169     |
| 11  | 0 | 10 | 0 | 24.8111            | 24.7688            | 0.0423             | 3.585625      | 3.591647      | -0.006022     |
| 12  | 2 | 1  | 2 | 26.0621            | 26.0029            | 0.0592             | 3.416274      | 3.423919      | -0.007645     |
| 13  | 2 | 9  | 0 | 27.0617            | 27.1027            | -0.0410            | 3.292314      | 3.287432      | 0.004883      |
| 14  | 0 | 11 | 1 | 29.3313            | 29.4326            | -0.1014            | 3.042522      | 3.032273      | 0.010249      |
| 15  | 0 | 12 | 0 | 29.8786            | 29.8933            | -0.0146            | 2.988020      | 2.986590      | 0.001430      |
| 16  | 1 | 11 | 1 | 30.3310            | 30.4082            | -0.0773            | 2.944482      | 2.937173      | 0.007309      |
| 17  | 0 | 1  | 3 | 31.7358            | 31.7744            | -0.0386            | 2.817270      | 2.813932      | 0.003337      |
| 18  | 4 | 3  | 1 | 33.2470            | 33.2214            | 0.0256             | 2.692586      | 2.694606      | -0.002020     |
| 19  | 3 | 9  | 1 | 33.8385            | 33.7772            | 0.0613             | 2.646862      | 2.651525      | -0.004663     |
| 20  | 0 | 13 | 1 | 34.1576            | 34.2230            | -0.0654            | 2.622860      | 2.618001      | 0.004859      |

|    |   |    |   |         |         |         |          |          |           |
|----|---|----|---|---------|---------|---------|----------|----------|-----------|
| 21 | 3 | 6  | 2 | 34.6525 | 34.6113 | 0.0412  | 2.586526 | 2.589509 | -0.002983 |
| 22 | 0 | 14 | 0 | 35.0067 | 35.0107 | -0.0040 | 2.561160 | 2.560875 | 0.000285  |
| 23 | 2 | 2  | 3 | 35.6102 | 35.6226 | -0.0124 | 2.519124 | 2.518278 | 0.000846  |
| 24 | 2 | 3  | 3 | 36.0619 | 36.0701 | -0.0082 | 2.488602 | 2.488059 | 0.000544  |
| 25 | 4 | 7  | 1 | 36.9278 | 36.8612 | 0.0666  | 2.432213 | 2.436453 | -0.004240 |
| 26 | 4 | 2  | 2 | 37.6836 | 37.6433 | 0.0403  | 2.385150 | 2.387612 | -0.002462 |
| 27 | 2 | 14 | 0 | 38.3377 | 38.3177 | 0.0201  | 2.345944 | 2.347127 | -0.001183 |
| 28 | 4 | 4  | 2 | 38.7099 | 38.8123 | -0.1024 | 2.324241 | 2.318344 | 0.005897  |
| 29 | 1 | 9  | 3 | 39.8289 | 39.7924 | 0.0365  | 2.261483 | 2.263475 | -0.001993 |
| 30 | 0 | 16 | 0 | 40.2083 | 40.2002 | 0.0081  | 2.241015 | 2.241447 | -0.000431 |
| 31 | 0 | 14 | 2 | 41.1454 | 41.1607 | -0.0153 | 2.192116 | 2.191334 | 0.000781  |
| 32 | 1 | 11 | 3 | 43.0264 | 43.0129 | 0.0136  | 2.100534 | 2.101165 | -0.000631 |
| 33 | 1 | 0  | 4 | 43.3518 | 43.3140 | 0.0378  | 2.085522 | 2.087254 | -0.001732 |
| 34 | 4 | 12 | 1 | 44.6262 | 44.6040 | 0.0222  | 2.028877 | 2.029836 | -0.000960 |
| 35 | 1 | 17 | 1 | 44.9233 | 44.9218 | 0.0015  | 2.016146 | 2.016211 | -0.000065 |
| 36 | 2 | 0  | 4 | 45.4834 | 45.4794 | 0.0040  | 1.992611 | 1.992779 | -0.000168 |
| 37 | 3 | 3  | 4 | 49.5027 | 49.5363 | -0.0336 | 1.839822 | 1.838653 | 0.001169  |
| 38 | 6 | 10 | 0 | 53.4699 | 53.4762 | -0.0063 | 1.712293 | 1.712105 | 0.000188  |
| 39 | 2 | 12 | 4 | 55.3753 | 55.3957 | -0.0203 | 1.657800 | 1.657239 | 0.000560  |
| 40 | 7 | 1  | 1 | 56.1317 | 56.1246 | 0.0072  | 1.637240 | 1.637432 | -0.000192 |
| 41 | 4 | 19 | 0 | 58.1352 | 58.1254 | 0.0098  | 1.585495 | 1.585739 | -0.000244 |
| 42 | 2 | 18 | 3 | 58.8269 | 58.8270 | 0.0000  | 1.568490 | 1.568490 | 0.000001  |
| 43 | 3 | 20 | 2 | 60.8807 | 60.8801 | 0.0006  | 1.520405 | 1.520418 | -0.000014 |
| 44 | 4 | 16 | 3 | 61.5598 | 61.5449 | 0.0149  | 1.505250 | 1.505578 | -0.000329 |
| 45 | 8 | 1  | 0 | 63.6657 | 63.6817 | -0.0159 | 1.460440 | 1.460113 | 0.000327  |
| 46 | 4 | 4  | 5 | 64.3036 | 64.3085 | -0.0049 | 1.447483 | 1.447385 | 0.000098  |
| 47 | 7 | 13 | 1 | 66.2833 | 66.2850 | -0.0017 | 1.408970 | 1.408938 | 0.000032  |

2)  $I$ - $V$  curve for a  $\kappa$ -(BETS)<sub>2</sub>FeCl<sub>4</sub> nanoparticle aggregate grown in the presence of OATM (10 molar eq. vs. BETS)

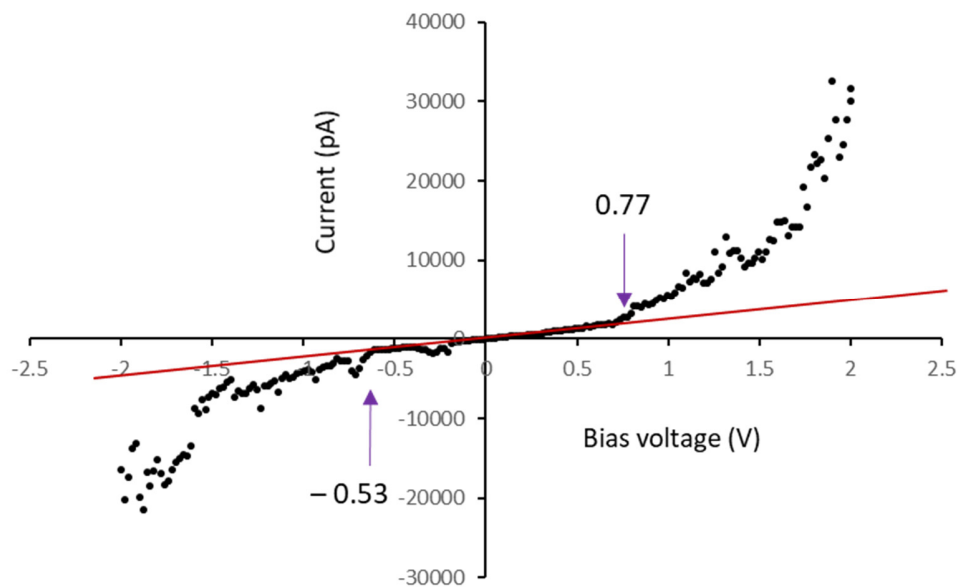

From the linear part of the curve around the origin of the coordinate system, we determine  $\Delta V = 0.77 - (-0.53) = 1.30$  V, *i.e.*, an energy gap of  $E_g = 1.30$  eV.
